# Supplementary material for: A hybrid mask RCNN-based tool to localize dental cavities from real-time mixed photographic images
Source: PeerJ journal article supplement (doi:10.7717/peerj-cs.888), 2022-02-18
Supplement: Instrument.pdf [file Instrument.pdf]

**SUS Questionnaire (adapted as an instrument [1][2]) to check the usability of the proposed dental cavity detection tool**

| Q. No | Statement                                                 | Strongly disagree |   |   |   |   | Strongly agree |
|-------|-----------------------------------------------------------|-------------------|---|---|---|---|----------------|
| 1     | I think that I would use this tool frequently.            | 1                 | 2 | 3 | 4 | 5 |                |
| 2     | I found the tool unnecessarily complex.                   | 1                 | 2 | 3 | 4 | 5 |                |
| 3     | I thought the tool is easy to use.                        | 1                 | 2 | 3 | 4 | 5 |                |
| 4     | I think, I need a technical person to use this tool.      | 1                 | 2 | 3 | 4 | 5 |                |
| 5     | I thought, there exists a lot of inconsistency in tool.   | 1                 | 2 | 3 | 4 | 5 |                |
| 6     | I found that many functions in tool were well integrated. | 1                 | 2 | 3 | 4 | 5 |                |
| 7     | I found awkward to use the tool.                          | 1                 | 2 | 3 | 4 | 5 |                |
| 8     | I felt very confident to use the tool.                    | 1                 | 2 | 3 | 4 | 5 |                |
| 9     | I needed to learn more before using the tool.             | 1                 | 2 | 3 | 4 | 5 |                |
| 10    | The tool is effective to use in medical field.            | 1                 | 2 | 3 | 4 | 5 |                |

1. Bangor, P. Kortum and J. Miller, "Determining what individual sus scores mean: Adding an adjective rating scale", *Journal of usability studies*, vol. 4, no. 3, pp. 114-123, 2009.
2. J. Brooke, "Sus: Usability evaluation in industry", 189, 1996.
