# Supplementary material for: A hybrid mask RCNN-based tool to localize dental cavities from real-time mixed photographic images
Source: PeerJ journal article supplement (doi:10.7717/peerj-cs.888), 2022-02-18
Supplement: SUS_RAW_SCORE.pdf [file SUS_RAW_SCORE.pdf]

Questionnaire Feedback

|     | Q1 | Q2 | Q3 | Q4 | Q5 | Q6 | Q7 | Q8 | Q9 | Q10 | Raw Score |
|-----|----|----|----|----|----|----|----|----|----|-----|-----------|
| D1  | 4  | 1  | 4  | 1  | 2  | 4  | 1  | 4  | 1  | 4   | 45        |
| D2  | 5  | 2  | 5  | 1  | 1  | 5  | 1  | 5  | 1  | 5   | 37.5      |
| D3  | 5  | 2  | 5  | 1  | 1  | 5  | 3  | 4  | 1  | 5   | 45        |
| A1  | 5  | 1  | 5  | 2  | 1  | 3  | 1  | 5  | 3  | 5   | 47.5      |
| A2  | 5  | 2  | 5  | 1  | 1  | 5  | 1  | 5  | 3  | 5   | 42.5      |
| A3  | 4  | 2  | 4  | 2  | 2  | 4  | 2  | 4  | 2  | 4   | 45        |
| A4  | 4  | 1  | 5  | 2  | 1  | 4  | 2  | 4  | 2  | 4   | 47.5      |
| S1  | 4  | 1  | 5  | 2  | 1  | 4  | 1  | 5  | 2  | 4   | 42.5      |
| S2  | 4  | 2  | 4  | 3  | 2  | 4  | 1  | 5  | 3  | 4   | 40        |
| S3  | 4  | 1  | 4  | 2  | 1  | 4  | 1  | 5  | 2  | 4   | 40        |
| S4  | 5  | 2  | 5  | 2  | 1  | 4  | 1  | 5  | 2  | 5   | 40        |
| S5  | 4  | 2  | 4  | 2  | 2  | 4  | 2  | 4  | 2  | 4   | 45        |
| S6  | 5  | 1  | 4  | 2  | 1  | 5  | 1  | 5  | 2  | 5   | 37.5      |
| S7  | 4  | 2  | 5  | 1  | 1  | 5  | 2  | 5  | 2  | 4   | 42.5      |
| S8  | 4  | 2  | 5  | 1  | 1  | 5  | 2  | 5  | 2  | 4   | 42.5      |
| S9  | 4  | 2  | 5  | 2  | 1  | 5  | 1  | 4  | 2  | 4   | 40        |
| S10 | 4  | 1  | 5  | 2  | 1  | 4  | 1  | 4  | 1  | 4   | 42.5      |
