# Supplementary material for: A hybrid mask RCNN-based tool to localize dental cavities from real-time mixed photographic images
Source: PeerJ journal article supplement (doi:10.7717/peerj-cs.888), 2022-02-18
Supplement: SUS_Scale_Scores.pdf [file SUS_Scale_Scores.pdf]

| Scale Scores  |    |    |    |    |    |    |    |    |    |     |             |
|---------------|----|----|----|----|----|----|----|----|----|-----|-------------|
|               | Q1 | Q2 | Q3 | Q4 | Q5 | Q6 | Q7 | Q8 | Q9 | Q10 | Score Value |
| D1            | 4  | 1  | 4  | 1  | 4  | 2  | 4  | 1  | 4  | 1   | 85          |
| D2            | 5  | 2  | 5  | 1  | 5  | 1  | 5  | 1  | 5  | 1   | 97.5        |
| D3            | 5  | 2  | 5  | 1  | 5  | 1  | 4  | 3  | 5  | 1   | 90          |
| A1            | 5  | 1  | 5  | 2  | 3  | 1  | 5  | 1  | 5  | 3   | 87.5        |
| A2            | 5  | 2  | 5  | 1  | 5  | 1  | 5  | 1  | 5  | 3   | 92.5        |
| A3            | 4  | 2  | 4  | 2  | 4  | 2  | 4  | 2  | 4  | 2   | 75          |
| A4            | 4  | 1  | 5  | 2  | 4  | 1  | 4  | 2  | 4  | 2   | 82.5        |
| S1            | 4  | 1  | 5  | 2  | 4  | 1  | 5  | 1  | 4  | 2   | 87.5        |
| S2            | 4  | 2  | 4  | 3  | 4  | 2  | 5  | 1  | 4  | 3   | 75          |
| S3            | 4  | 1  | 4  | 2  | 4  | 1  | 5  | 1  | 4  | 2   | 85          |
| S4            | 5  | 2  | 5  | 2  | 4  | 1  | 5  | 1  | 5  | 2   | 90          |
| S5            | 4  | 2  | 4  | 2  | 4  | 2  | 4  | 2  | 4  | 2   | 75          |
| S6            | 5  | 1  | 4  | 2  | 5  | 1  | 5  | 1  | 5  | 2   | 92.5        |
| S7            | 4  | 2  | 5  | 1  | 5  | 1  | 5  | 2  | 4  | 2   | 87.5        |
| S8            | 4  | 2  | 5  | 1  | 5  | 1  | 5  | 2  | 4  | 2   | 87.5        |
| S9            | 4  | 2  | 5  | 2  | 5  | 1  | 4  | 1  | 4  | 2   | 85          |
| S10           | 4  | 1  | 5  | 2  | 4  | 1  | 4  | 1  | 4  | 1   | 87.5        |
| Average Score |    |    |    |    |    |    |    |    |    |     | 86.03       |
