# Supplementary material for: A hybrid mask RCNN-based tool to localize dental cavities from real-time mixed photographic images
Source: PeerJ journal article supplement (doi:10.7717/peerj-cs.888), 2022-02-18
Supplement: USER_demographics.pdf [file USER_demographics.pdf]

| User Demographic Details |                  |     |        |                                     |                                      |                                 |                          |                                            |
|--------------------------|------------------|-----|--------|-------------------------------------|--------------------------------------|---------------------------------|--------------------------|--------------------------------------------|
| Uid                      | Name             | Age | Gender | Manual Assessment Expirience(Years) | Manual tools to assess Dental Images | Automatic Assessment Expirience | Well Known dental Images | Automatic Tool for dental Image Processing |
| D1                       | Ghazala          | 42  | Female | 15                                  | Mirror, dental Explorer              | 10 Years                        | X-Ray, Digital Colored   | Logicon                                    |
| D2                       | Imran Rasheed    | 38  | Male   | 11                                  | Mirror, Dental Explorer              | 0                               | X-Ray                    | Null                                       |
| D3                       | Ali Imram        | 43  | Male   | 15                                  | Mirror, Dental Explorer              | 10 Years                        | X-Ray, Colored           | Logicon                                    |
| A1                       | Naier Jamal      | 20  | Male   | 1                                   | Examination Set                      | 0                               | X-Ray                    | Null                                       |
| A2                       | Sundas Javed     | 22  | Female | 3                                   | Examination Set                      | 0                               | X-Ray                    | Null                                       |
| A3                       | Anosha Sajjad    | 23  | Female | 2                                   | Examination Set                      | 0                               | X-Ray                    | Null                                       |
| A4                       | Tariq Hussain    | 18  | Male   | 1                                   | Examination Set                      | 0                               | X-Ray                    | Null                                       |
| S1                       | Sidra Nasir Qazi | 25  | Female | 0                                   | Mirror, Dental Explorer              | 0                               | X-Rays, Colored          | Null                                       |
| S2                       | Salka Urooj      | 25  | Female | 0                                   | Mirror, Dental Explorer              | 0                               | X-Rays, Colored          | Null                                       |
| S3                       | Bakhtawar Aziz   | 24  | Female | 0                                   | Mirror, Dental Explorer              | 0                               | X-Rays, Colored          | Null                                       |
| S4                       | Kiren Shambleed  | 26  | Female | 0                                   | Mirror, Dental Explorer              | 0                               | X-Rays, Colored          | Null                                       |
| S5                       | Anosha Sajid     | 25  | Female | 0                                   | Mirror, Dental Explorer              | 0                               | X-Rays, Colored          | Null                                       |
| S6                       | Wajih Kanwal     | 25  | Female | 0                                   | Mirror, Dental Explorer              | 0                               | X-Rays, Colored          | Null                                       |
| S7                       | Huria Javed      | 25  | Female | 0                                   | Mirror, Dental Explorer              | 0                               | X-Rays, Colored          | Null                                       |

|     |                    |    |        |   |                         |   |                 |      |
|-----|--------------------|----|--------|---|-------------------------|---|-----------------|------|
| S8  | Lalarukh<br>Abbasi | 24 | Female | 0 | Mirror, Dental Explorer | 0 | X-Rays, Colored | Null |
| S9  | Farheen<br>Sajid   | 25 | Female | 0 | Mirror, Dental Explorer | 0 | X-Rays, Colored | Null |
| S10 | Hadia Azeem        | 25 | Female | 0 | Mirror, Dental Explorer | 0 | X-Rays, Colored | Null |
